# Supplementary material for: Preponderant role of pentafluorophenyl moieties for tuning the electronic properties of extended benzodifuran-azomethine derivatives
Source: Royal Society of Chemistry journal article supplement (doi:10.1039/d1nj01132d), 2021-01-01
Supplement: d1nj01132d1.pdf [file d1nj01132d1.pdf]

## Supplementary Information

The preponderant role of the perfluorobenzene moieties in the electronic properties and the stacking modes of extended benzodifuran-azomethine derivatives.

Chady Moussalem, Magali Allain, Frederic Gohier and Pierre Frère



**Figure S1:** Normalized absorbance spectra  $10^{-5}$  M in  $\text{CHCl}_3$  (black line), fluorescence spectra  $10^{-5}$  M in  $\text{CHCl}_3$  (blue dotted line) and fluorescence spectra in the solid state (blue line)



**Figure S2:** Normalized absorbance spectra  $10^{-5}$  M in  $\text{CHCl}_3$  (black line), fluorescence spectra  $10^{-5}$  M in  $\text{CHCl}_3$  (blue dotted line) and fluorescence spectra in the solid state (blue line)



**Figure S3:** Normalized absorbance spectra  $10^{-5}$  M in  $\text{CHCl}_3$  (black line), fluorescence spectra  $10^{-5}$  M in  $\text{CHCl}_3$  (blue dotted line) and fluorescence spectra in the solid state (blue line)

Table S1: Crystallographic data of **BDF-NH<sub>2</sub>**, **BDF-1** and **DBF-2**

|                                                        | <b>BDF-NH<sub>2</sub></b>                                                    | <b>BDF-1</b>                                                                 | <b>BDF-2</b>                                                                  |
|--------------------------------------------------------|------------------------------------------------------------------------------|------------------------------------------------------------------------------|-------------------------------------------------------------------------------|
| <b>Formula</b>                                         | C <sub>22</sub> H <sub>6</sub> F <sub>10</sub> N <sub>2</sub> O <sub>2</sub> | C <sub>36</sub> H <sub>4</sub> F <sub>20</sub> N <sub>2</sub> O <sub>2</sub> | C <sub>32</sub> H <sub>10</sub> F <sub>15</sub> N <sub>3</sub> O <sub>2</sub> |
| <b>M</b>                                               | 520.29                                                                       | 876.41                                                                       | 753.43                                                                        |
| <b>T (K)</b>                                           | 293                                                                          | 293                                                                          | 293                                                                           |
| <b>Crystal system</b>                                  | Monoclinic                                                                   | Triclinic                                                                    | Triclinic                                                                     |
| <b>Space group</b>                                     | P 21/n                                                                       | P -1                                                                         | P -1                                                                          |
| <b>Unit cell.:</b>                                     |                                                                              |                                                                              |                                                                               |
| <b>a (Å)</b>                                           | 11.3307(7)                                                                   | 6.537(4)                                                                     | 11.334(3)                                                                     |
| <b>b (Å)</b>                                           | 7.8416(7)                                                                    | 10.866(3)                                                                    | 12.585(1)                                                                     |
| <b>c (Å)</b>                                           | 11.397(1)                                                                    | 11.701(9)                                                                    | 12.741(3)                                                                     |
| <b>a (°)</b>                                           | 90                                                                           | 71.27(6)                                                                     | 69.48(1)                                                                      |
| <b>b (°)</b>                                           | 116.681(5)                                                                   | 89.53(6)                                                                     | 66.48(2)                                                                      |
| <b>g (°)</b>                                           | 90                                                                           | 78.96(4)                                                                     | 63.37(1)                                                                      |
| <b>Volume (Å<sup>3</sup>)</b>                          | 904.81(13)                                                                   | 771.3(8)                                                                     | 1456.6(5)                                                                     |
| <b>Z</b>                                               | 2                                                                            | 1                                                                            | 2                                                                             |
| <b>Calculated density (g.cm<sup>-3</sup>)</b>          | 1.910                                                                        | 1.887                                                                        | 1.718                                                                         |
| <b>Absorption coefficient (mm<sup>-1</sup>)</b>        | 0.194                                                                        | 0.201                                                                        | 0.174                                                                         |
| <b>F(000)</b>                                          | 516                                                                          | 430                                                                          | 748                                                                           |
| <b>q range (°)</b>                                     | 4.00 to 30.04                                                                | 2.25 to 27.25                                                                | 3.27 to 27.50                                                                 |
| <b>Limiting indices</b>                                | -15<=h<=13<br>-11<=k<=11<br>-16<=l<=16                                       | -8<=h<=8<br>-13<=k<=13<br>-15<=l<=15                                         | -14<=h<=14<br>-16<=k<=14<br>-16<=l<=16                                        |
| <b>Reflection coll.</b>                                | 18594                                                                        | 12115                                                                        | 48840                                                                         |
| <b>Unique</b>                                          | 2625                                                                         | 3380                                                                         | 6657                                                                          |
| <b>R (int)</b>                                         | 0.0344                                                                       | 0.1335                                                                       | 0.14771                                                                       |
| <b>Data</b>                                            | 2625                                                                         | 3380                                                                         | 6657                                                                          |
| <b>Restraints</b>                                      | 0                                                                            | 0                                                                            | 0                                                                             |
| <b>Parameters</b>                                      | 175                                                                          | 271                                                                          | 471                                                                           |
| <b>Final R indice [<math>I &gt; 2\sigma(I)</math>]</b> | [2086]                                                                       | [1219]                                                                       | [2905]                                                                        |
| <b>R1</b>                                              | 0.0391                                                                       | 0.0849                                                                       | 0.0739                                                                        |
| <b>wR2</b>                                             | 0.1039                                                                       | 0.1539                                                                       | 0.1248                                                                        |
| <b>R indices (all data)</b>                            |                                                                              |                                                                              |                                                                               |
| <b>R1</b>                                              | 0.0523                                                                       | 0.2570                                                                       | 0.1990                                                                        |
| <b>wR2</b>                                             | 0.1156                                                                       | 0.2205                                                                       | 0.1699                                                                        |
| <b>Goodness of fit on F<sup>2</sup></b>                | 1.066                                                                        | 1.010                                                                        | 1.074                                                                         |
| <b>Largest diff.</b>                                   | 0.355                                                                        | 0.323                                                                        | 0.243                                                                         |
| <b>Peak and hole (e Å<sup>-3</sup>)</b>                | -0.245                                                                       | -0.318                                                                       | -0.271                                                                        |
| <b>CCDC number</b>                                     | 2062621                                                                      | 2062622                                                                      | 2062623                                                                       |



$^1\text{H}$  NMR of BDF-1 ( $\text{CDCl}_3$ )



$^{19}\text{F}$  NMR of **BDF-1** ( $\text{CDCl}_3$ )



<sup>1</sup>H NMR of **BDF-2** (CD<sub>3</sub>CO)



$^{19}\text{F}$  NMR of **BDF-2** ( $\text{CD}_3\text{CO}$ )



$^1\text{H}$  NMR of BDF-3 ( $\text{CD}_3\text{CO}$ )



$^{19}\text{F}$  NMR of **BDF-3** ( $\text{CD}_3\text{CO}$ )

HRMS (MALDI TOF) of **BDF-1**

## Elemental Composition Estimation

## Parameters:

| Mass                    | Tolerance | Electron Mode | Charge | DBE Range    | Max Results |
|-------------------------|-----------|---------------|--------|--------------|-------------|
| 875.99494 $\pm$ 0.00018 | 0.2 ppm   | Odd/Even      | +1     | -0.5 - 200.0 | 100         |

## Elements

| C      | H       | N     | O     | F      |
|--------|---------|-------|-------|--------|
| 0 - 40 | 0 - 200 | 0 - 5 | 0 - 5 | 0 - 20 |

## Results:

| # | Formula                                                                      | Mass      | DBE  | Abs. Error (u) | Error (u) | Error (ppm) |
|---|------------------------------------------------------------------------------|-----------|------|----------------|-----------|-------------|
| 1 | C <sub>36</sub> H <sub>4</sub> N <sub>2</sub> O <sub>2</sub> F <sub>20</sub> | 875.99479 | 26.0 | 0.00015        | 0.00015   | 0.17        |

HRMS (MALDI TOF) of **BDF-2**

## Elemental Composition Estimation

## Parameters:

| Mass                | Tolerance | Electron Mode | Charge | DBE Range    | Max Results |
|---------------------|-----------|---------------|--------|--------------|-------------|
| 753.05252 ± 0.00030 | 0.4 ppm   | Odd/Even      | +1     | -0.5 - 200.0 | 100         |

## Elements

| C       | H       | N     | O     | F      |
|---------|---------|-------|-------|--------|
| 30 - 40 | 0 - 200 | 0 - 5 | 0 - 5 | 0 - 20 |

## Results:

| # | Formula                                                                       | Mass      | DBE  | Abs. Error (u) | Error (u) | Error (ppm) |
|---|-------------------------------------------------------------------------------|-----------|------|----------------|-----------|-------------|
| 1 | C <sub>32</sub> H <sub>10</sub> N <sub>3</sub> O <sub>2</sub> F <sub>15</sub> | 753.05280 | 22.0 | 0.00028        | -0.00028  | -0.38       |

HRMS (MALDI TOF) of **BDF-3**

## Elemental Composition Estimation

## Parameters:

| Mass                | Tolerance | Electron Mode | Charge | DBE Range    | Max Results |
|---------------------|-----------|---------------|--------|--------------|-------------|
| 630.11134 ± 0.00063 | 1.0 ppm   | Odd/Even      | +1     | -0.5 - 200.0 | 100         |

## Elements

| Element | Range   |
|---------|---------|
| C       | 0 - 30  |
| H       | 0 - 200 |
| N       | 0 - 5   |
| O       | 0 - 5   |
| F       | 0 - 10  |

## Results:

| # | Formula                                                                       | Mass      | DBE  | Abs. Error (u) | Error (u) | Error (ppm) |
|---|-------------------------------------------------------------------------------|-----------|------|----------------|-----------|-------------|
| 1 | C <sub>28</sub> H <sub>16</sub> N <sub>4</sub> O <sub>2</sub> F <sub>10</sub> | 630.11081 | 18.0 | 0.00053        | 0.00053   | 0.85        |
